# Supplementary material for: Auf den Spuren eines Politikfeldes: Die Institutionalisierung von Internetpolitik in der Ministerialverwaltung
Source: Springer Nature journal article supplement (doi:10.1007/s11609-020-00397-4), 2019-12-01
Supplement: MOESM1 [file 17708848]

**Online-Dok. 1** Werdegang der Unterabteilung VI B „Digitale Agenda, Digitale Medien“ im BMWi

1995 1996 1997 1998 1999 2000 2001 2002 2003 2004 2005 2006 2007 2008 2010 2011 2012 2013 2014 2015

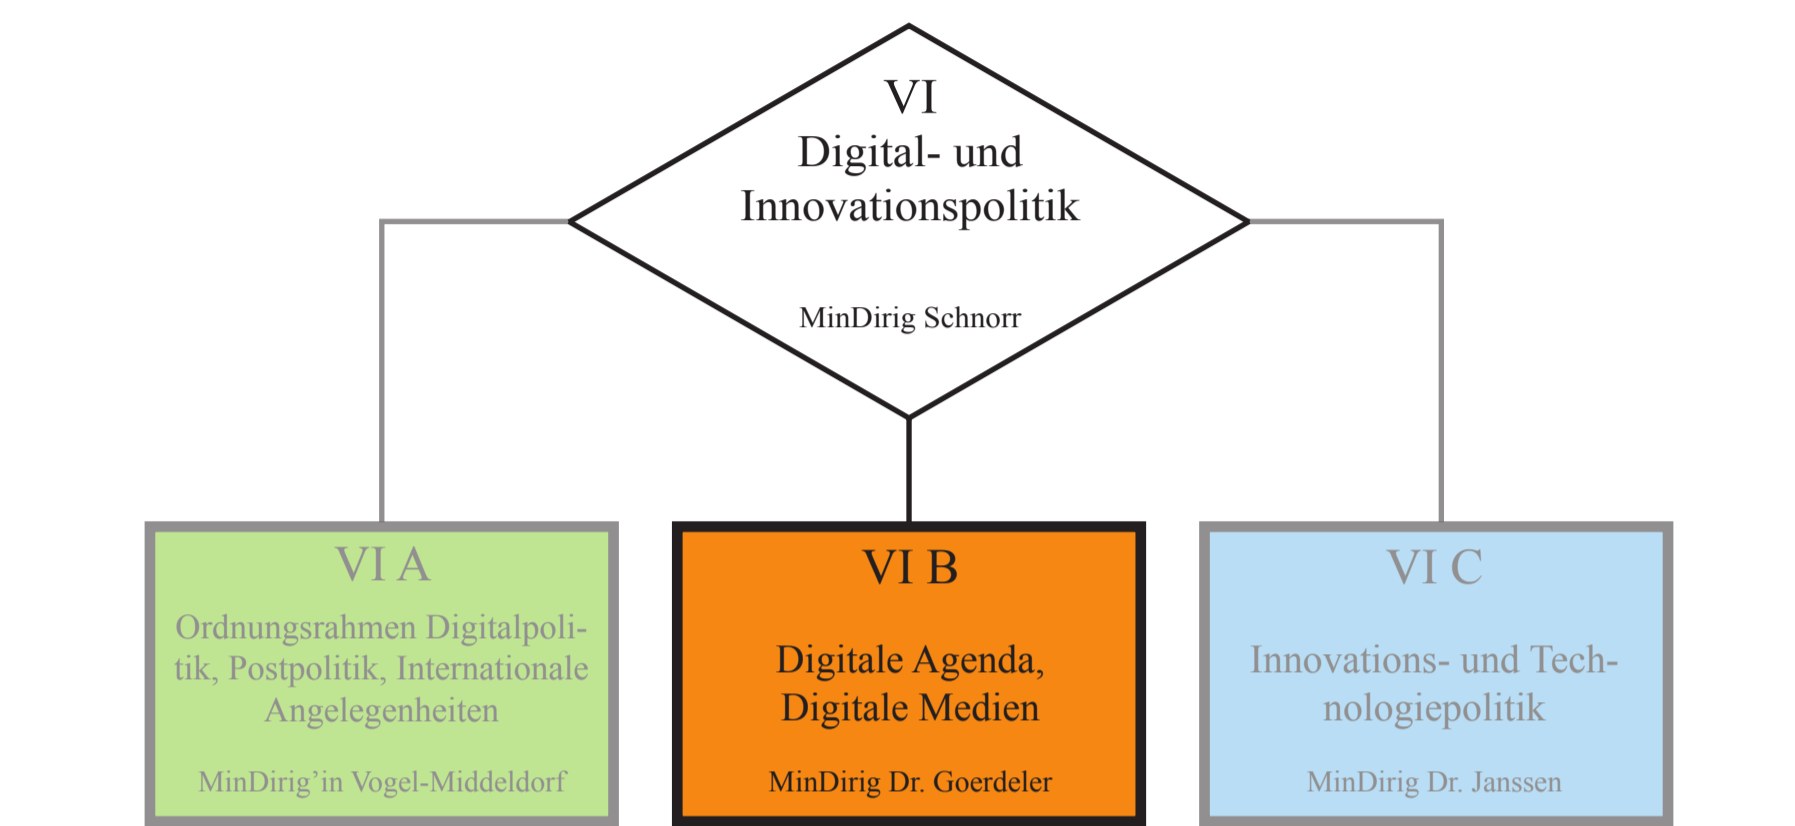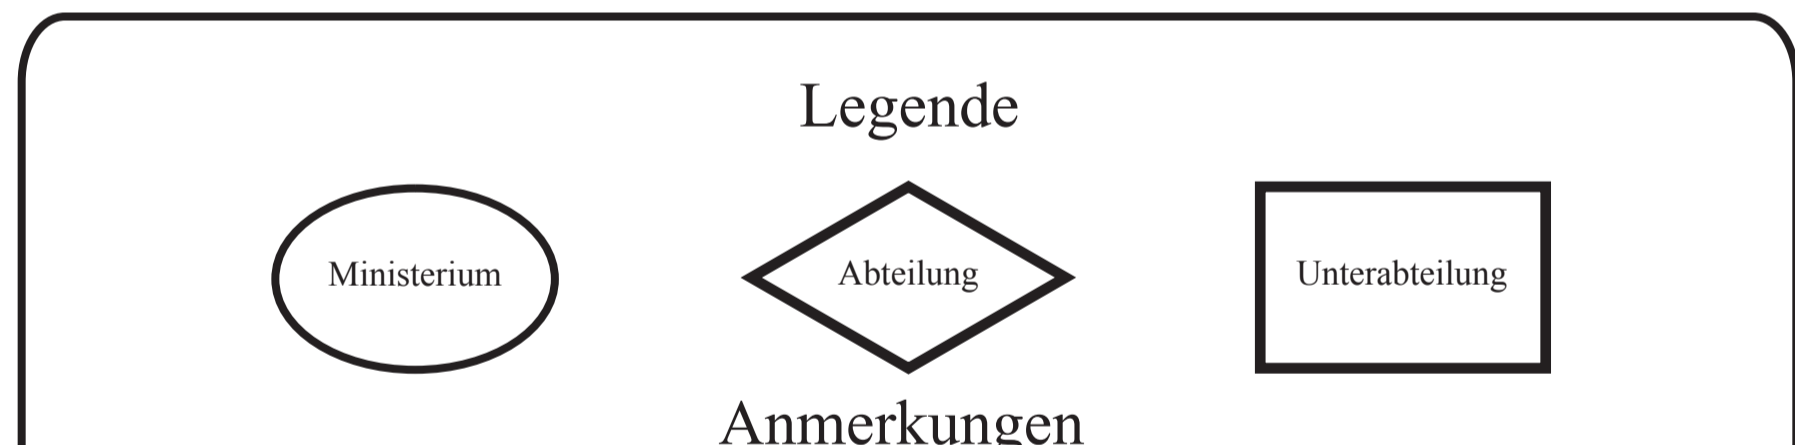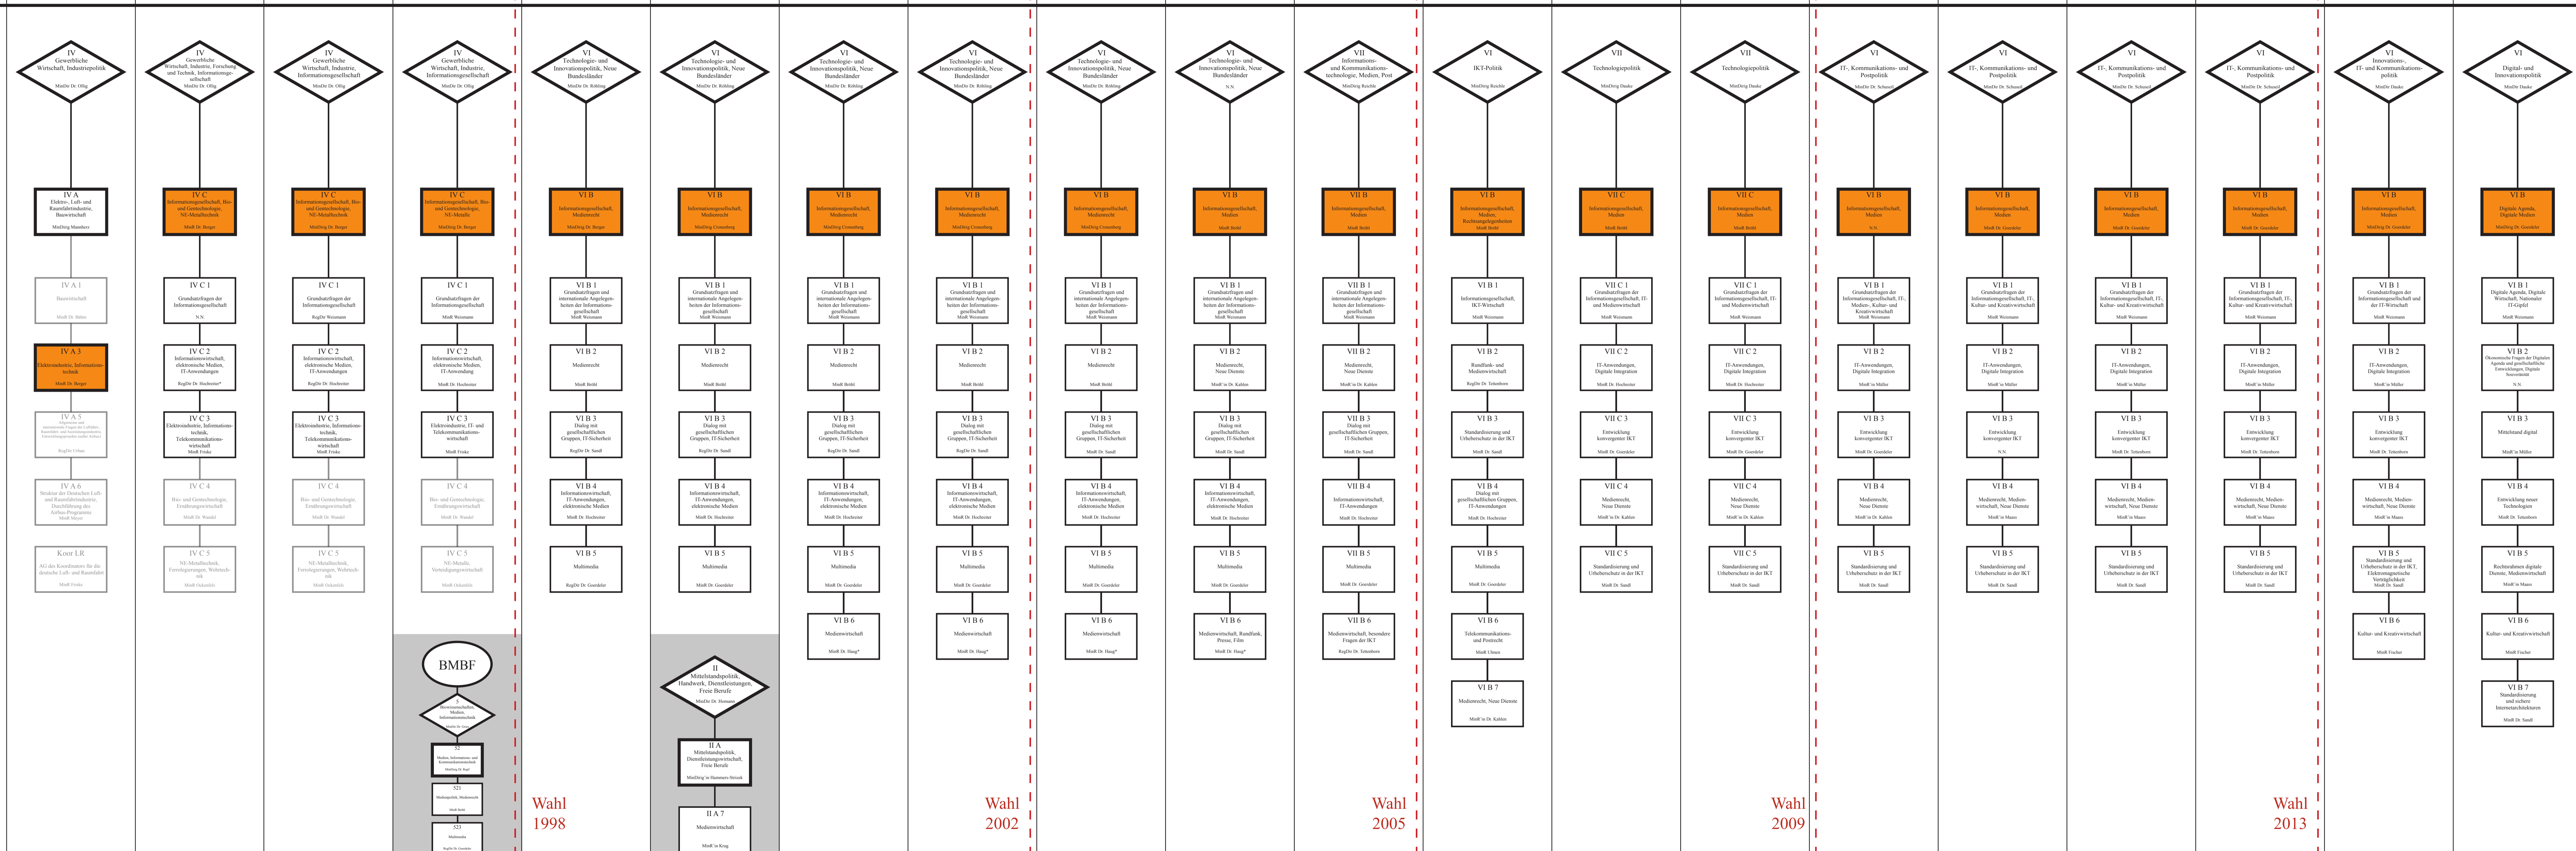

Wahl 1998

Wahl 2002

Wahl 2005

Wahl 2009

Wahl 2013

\*Gleichzeitig Leiter VI B C 3 Teubachhofgeopreistrungen, Rechtsfragen, Einzelfälle
