# Supplementary material for: Auf den Spuren eines Politikfeldes: Die Institutionalisierung von Internetpolitik in der Ministerialverwaltung
Source: Springer Nature journal article supplement (doi:10.1007/s11609-020-00397-4), 2019-12-01
Supplement: MOESM2 [file 17708848]

VI  
 Digital- und Innovationspolitik  
 MinDirig  
 Schnorr

|                                                                                                                                                                                       |                                                                                                                                                       |                                                                                                                                      |                                                                                                                                                  |
|---------------------------------------------------------------------------------------------------------------------------------------------------------------------------------------|-------------------------------------------------------------------------------------------------------------------------------------------------------|--------------------------------------------------------------------------------------------------------------------------------------|--------------------------------------------------------------------------------------------------------------------------------------------------|
| VIA<br>Ordnungsrahmen<br>Digitalpolitik, Postpolitik,<br>Internationales, Medien<br><br>MinDirig'in<br>Dr. Brönstrup                                                                  | VIB<br>Nationale und<br>europäische Digitale<br>Agenda<br><br>MinDirig<br>Dr. Goerdeler                                                               | VIC<br>Innovations- und<br>Technologiepolitik<br><br>MinDirig<br>Dr. Janssen                                                         | VID<br>Normung und<br>Standardisierung,<br>Sicherheit<br><br>MinDirig<br>Engelhard                                                               |
| VIA 1<br>Grundsatzfragen der TK-<br>und Postpolitik,<br>wettbewerbs- und<br>regulierungspolitische<br>Fragen der<br>Digitalisierung,<br>Fachaufsicht BNetzA<br><br>MinR<br>Dr. Knauth | VIB 1<br>Digitale Agenda, Digitale<br>Wirtschaft,<br>Nationaler IT-Gipfel<br><br>MinR<br>Weismann                                                     | VIC 1<br>Grundsatzfragen der<br>nationalen und<br>internationalen<br>Innovations- und<br>Technologiepolitik<br><br>MinR<br>Crasemann | VID 1<br>Technologietransfer<br>durch Normung und<br>Patente,<br>Grundsatzfragen der<br>Normungs- und<br>Patentpolitik<br><br>MinR<br>Dr. Zielke |
| VIA 2<br>Telekommunikations-<br>und Postrecht<br><br>MinR<br>Ulmen                                                                                                                    | VIB 2<br>Ökonomische Fragen der<br>Digitalen Agenda und<br>gesellschaftliche<br>Entwicklungen, Digitale<br>Souveränität<br><br>RegDir<br>Dr. Käseberg | VIC 2<br>Akkreditierung und<br>Konformitätsbewertung,<br>Messwesen,<br>Fachaufsicht PTB und<br>BAM<br><br>MinR<br>Dr. Schultes       | VID 2<br>Standardisierung in der<br>IKT und sichere<br>Internetarchitekturen<br><br>MinR<br>Dr. Sandl                                            |
| VIA 3<br>Rechtsrahmen digitale<br>Dienste, Medienwirtschaft<br><br>MinR'in<br>Maass                                                                                                   | VIB 3<br>Mittelstand Digital<br><br>MinR'in<br>Müller                                                                                                 | VIC 3<br>Zentrales<br>Innovationsprogramm<br>Mittelstand (ZIM)<br><br>MinR'in<br>Heidecke                                            | VID 3<br>IKT-Sicherheit,<br>Notfallvorsorge, Initiative<br>IT-Sicherheit in der<br>Wirtschaft<br><br>MinR'in<br>Husch                            |
| VIA 4<br>Internationale Digital- und<br>Postpolitik, Internet<br>Governance<br><br>MinR<br>Dr. Romer                                                                                  | VIB 4<br>Entwicklung digitaler<br>Technologien<br><br>MinR<br>Dr. Tettenborn                                                                          | VIC 4<br>Industrieforschung für<br>Unternehmen,<br>Innovationsberatung<br><br>MinR<br>Zuleger                                        | VID 4<br>Produkt- und<br>Anlagensicherheit<br><br>MinR<br>Böhme                                                                                  |
| VIA 5<br>Kultur- und<br>Kreativwirtschaft<br><br>MinR<br>Fischer                                                                                                                      | VIB 5<br>Europäische Digitalpolitik<br><br>MinR<br>Dr. Goebbels                                                                                       | Quelle: Entnommen aus dem<br>Organisationsplan<br>des Bundesministeriums für<br>Wirtschaft und Energie<br>vom 27.10.2016             |                                                                                                                                                  |
