# Supplementary material for: Auf den Spuren eines Politikfeldes: Die Institutionalisierung von Internetpolitik in der Ministerialverwaltung
Source: Springer Nature journal article supplement (doi:10.1007/s11609-020-00397-4), 2019-12-01
Supplement: MOESM3 [file 17708848]

**Online-Dok. 3** Werdegang der Abteilung IT im BMI

März 1995    April 1996    April 1997    April 1998    April 1999    März 2000    April 2001    März 2002    Januar 2003    August 2004    Mai 2005    Mai 2006    September 2007    April 2008    Oktober 2008    März 2010    September 2011    März 2012    Mai 2013    Januar 2014    Juli 2014

Anmerkung: Die Kästen mit gestrichelten Linien verweisen auf Organisationseinheiten ohne direkten Bezug zur Abteilung IT. Die mit durchgezogener Linie gekennzeichneten Einheiten weisen einen Bezug zur Abteilung IT auf. Die Kästen mit fetten durchgezogenen Linien verweisen auf Einheiten mit Leitungsfunktion und einem Bezug zur Abteilung IT.

Quelle: Eigene Zusammenstellung auf der Grundlage von: Bund transparent. Parlament, Regierung, Bundesbehörden. Organisation, Gremien, Anschriften, Namen. Ausgaben 1995 bis 2014. Bad Honnef: Bock. Staatshandbuch Bund. Verzeichnis der Behörden mit Aufgabenbeschreibungen und Adressen. Ausgaben 1995 bis 2015. Köln u.a.: Carl Heymanns Verlag.

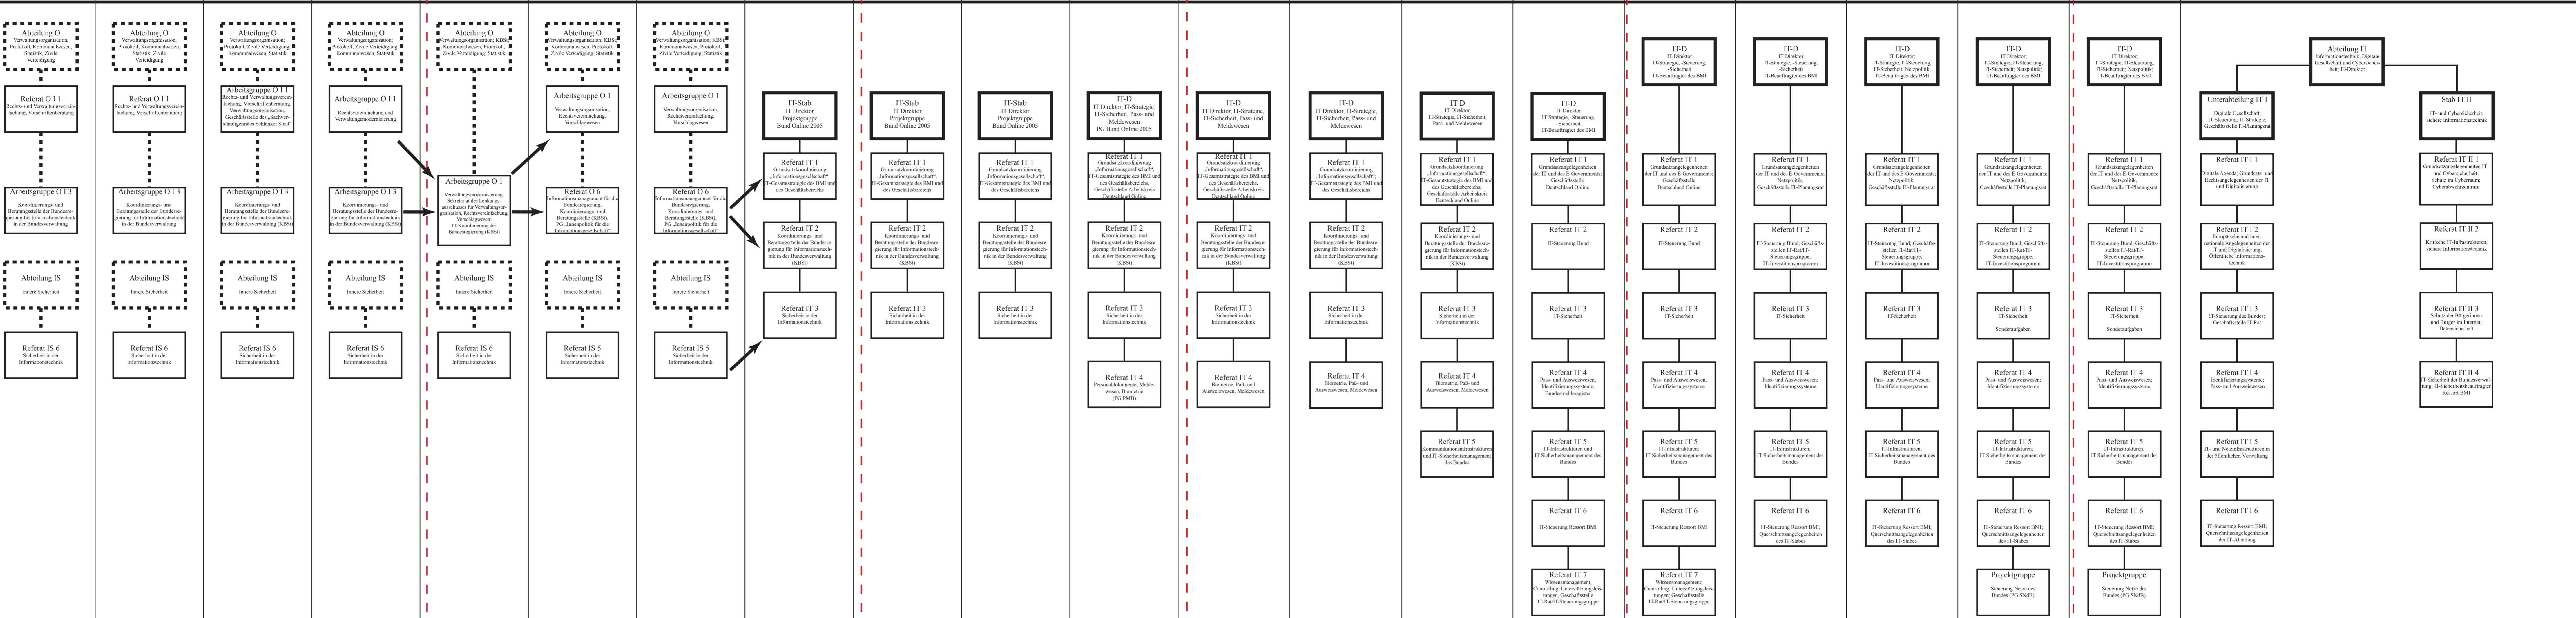

Wahl 1998

Wahl 2002

Wahl 2005

Wahl 2009

Wahl 2013
