# Supplementary material for: Auf den Spuren eines Politikfeldes: Die Institutionalisierung von Internetpolitik in der Ministerialverwaltung
Source: Springer Nature journal article supplement (doi:10.1007/s11609-020-00397-4), 2019-12-01
Supplement: MOESM4 [file 17708848]

# Online-Dok. 4 Personalunion zwischen Stab IT II und Stab ÖS III 2015 im BMI

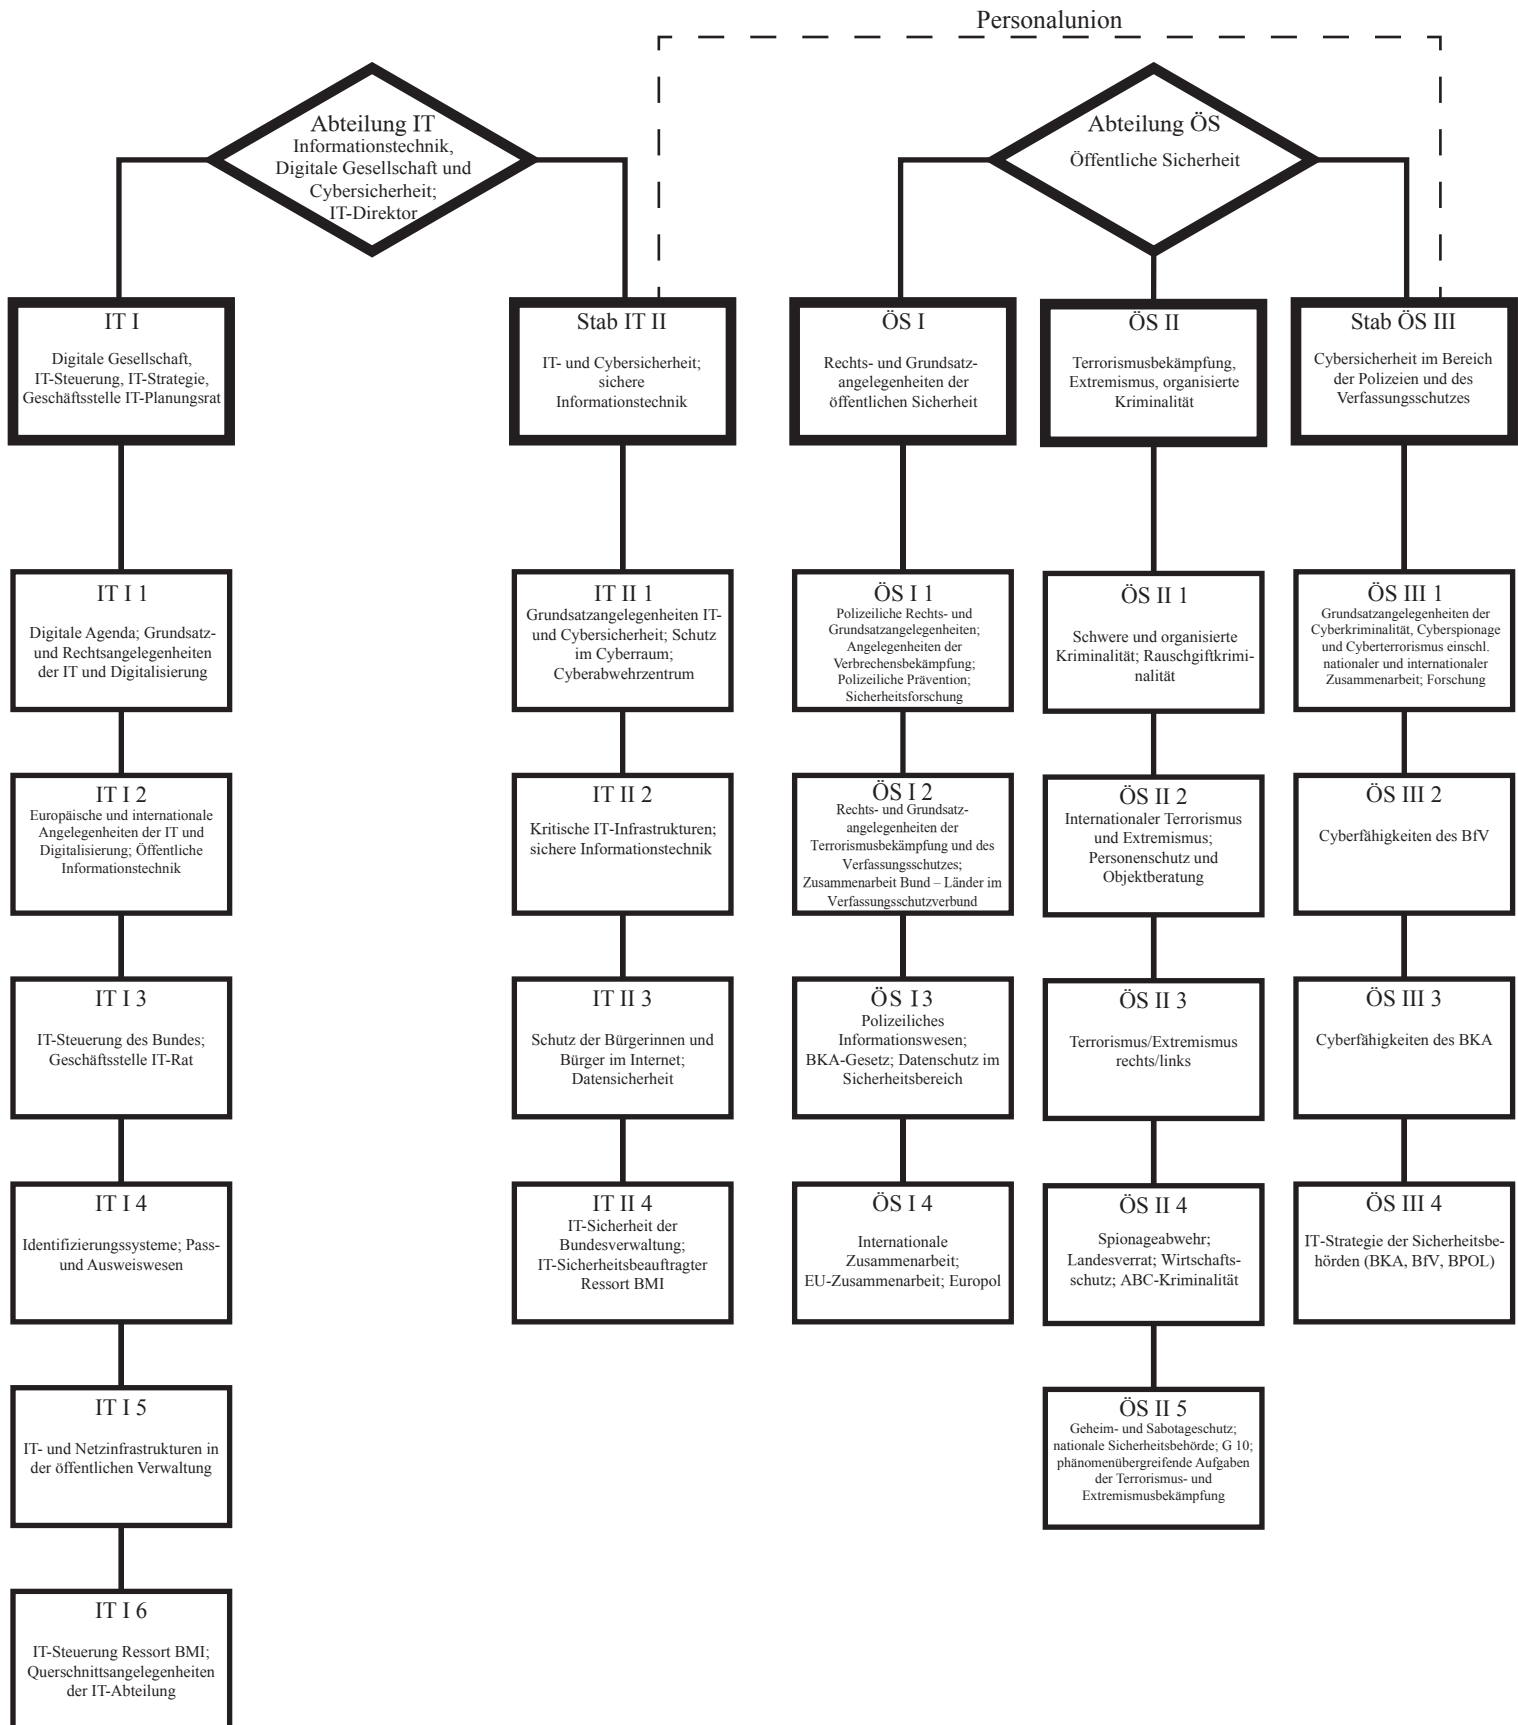

Quelle: Eigene Darstellung auf der Grundlage des Organisationsplans des Bundesministeriums des Inneren vom 02.05.2015, Az.: ZI2 – 12012/2
