# Supplementary material for: Auf den Spuren eines Politikfeldes: Die Institutionalisierung von Internetpolitik in der Ministerialverwaltung
Source: Springer Nature journal article supplement (doi:10.1007/s11609-020-00397-4), 2019-12-01
Supplement: MOESM5 [file 17708848]

**Online-Tab. 1** Zyklus des Forschungsprozesses

|                     | I                                                                                                                                                                                                                                                                                                                        | II                                                                                                                                                                                                                                                                                                                                                                                                                                               | III                                                                                                                                                                                                                                                                                                                                                                                                                                                                                                                      |
|---------------------|--------------------------------------------------------------------------------------------------------------------------------------------------------------------------------------------------------------------------------------------------------------------------------------------------------------------------|--------------------------------------------------------------------------------------------------------------------------------------------------------------------------------------------------------------------------------------------------------------------------------------------------------------------------------------------------------------------------------------------------------------------------------------------------|--------------------------------------------------------------------------------------------------------------------------------------------------------------------------------------------------------------------------------------------------------------------------------------------------------------------------------------------------------------------------------------------------------------------------------------------------------------------------------------------------------------------------|
| Analyse-Form        | Organigramm-Analyse                                                                                                                                                                                                                                                                                                      | Interview-Analyse                                                                                                                                                                                                                                                                                                                                                                                                                                | Dokumenten-Analyse                                                                                                                                                                                                                                                                                                                                                                                                                                                                                                       |
| Forschungsinteresse | Wann wurden wo welche Kompetenzen für Internetpolitik aufgebaut?<br>Aus welchen Bereichen entstanden die Kompetenzen?<br>Gibt es Phasen und Umbrüche in den Organigramm-Historien?<br>Wie sehen diese sowohl auf semantischer als auch organisationaler Ebene aus?                                                       | Was steckt hinter den Veränderungen in den Organigramm-Historien?<br>Wie und wodurch kam es dazu?<br>Was war der Kontext?<br>Wie war die Wahrnehmung der Beamten, und wie hat sie sich verändert?<br>Welche Geschichten des Wandels werden erzählt?<br>Wie deuten die Beamten diesen Wandel?<br>Gab es Alternativpfade?                                                                                                                          | Was sind die Hintergründe und Kontexte der Verweise in den Organigrammen und Interviews?<br>(z.B. Verweise auf Diskurse und externe Akteure durch Begriffe, Kategorien oder Hinweise)                                                                                                                                                                                                                                                                                                                                    |
| Herangehensweise    | <ul style="list-style-type: none"> <li>• Revers-chronologische Verfolgung der Einheiten der Abteilungen zu ihrem Ursprung</li> <li>• Verfolgung semantischer Veränderungen in Abteilungs- und Referatsbenennungen</li> <li>• Identifikation von Begriffen, die auf bestimmte Deutungen und Diskurse verweisen</li> </ul> | <ul style="list-style-type: none"> <li>• Narrative, berufsbiografische Interviews mit leitenden Ministerialbeamten</li> <li>• Konfrontation der Beamten mit für sie relevanten Befunden aus den Organigramm-Historien</li> <li>• Offenes (re)kodieren der Interviews (z.T. theorieangeleitet)</li> <li>• Verknüpfung der Befunde mit Befunden aus Schritt I</li> <li>• Interpretation und In-Bezug-Setzen der Geschichten der Beamten</li> </ul> | <ul style="list-style-type: none"> <li>• Klärung von Hinweisen, Fragen und Lücken, wie sie sich aus Schritt I oder II ergeben</li> <li>• Vertiefung des Verständnisses von identifizierten Kategorien, Diskursen und Konflikten</li> <li>• Weitere Erschließung des Kontextes der Veränderungen, wie sie sich aus den Verweisen in den Organigramm-Historien und den Interviews ergeben</li> <li>• Begriffe, Kategorien und Deutungen aus Schritt I und II dienen als Ausgangspunkt für die Dokumentenauswahl</li> </ul> |
| Daten               | Organigramme der Ministerien 1995–2014                                                                                                                                                                                                                                                                                   | Interview-Transkripte, Erzählungen der Interviewpartner                                                                                                                                                                                                                                                                                                                                                                                          | Behörden- und Regierungspublikationen, Wissenschaftliche Publikationen, Medienpublikationen                                                                                                                                                                                                                                                                                                                                                                                                                              |
| Output              | Vorverständnis des Wandels, Organigramm-Historien (= grafische Darstellung des Wandels)                                                                                                                                                                                                                                  | Anreicherung und Korrektur des Vorverständnisses aus Schritt I                                                                                                                                                                                                                                                                                                                                                                                   | Anreicherung und Korrektur des präzisierten Verständnisses des Wandels aus Schritt I bzw. Schritt II                                                                                                                                                                                                                                                                                                                                                                                                                     |
| Nächster Vorgang    | Übergang zu Schritt III und dann zu Schritt II                                                                                                                                                                                                                                                                           | Übergang zu Schritt III                                                                                                                                                                                                                                                                                                                                                                                                                          | Übergang zu Schritt IV                                                                                                                                                                                                                                                                                                                                                                                                                                                                                                   |

IV

Finalisierung des empirisch gestützten Narrativs des organisationalen Wandels in den Ministerien und Ableitung der Positionierungen
