# Supplementary material for: Auf den Spuren eines Politikfeldes: Die Institutionalisierung von Internetpolitik in der Ministerialverwaltung
Source: Springer Nature journal article supplement (doi:10.1007/s11609-020-00397-4), 2019-12-01
Supplement: MOESM6 [file 17708848]

## Online-Tab. 2 Semantische und organisationale Aspekte der Institutionalisierung eines Politikfeldes

| Einschreibungsebene   | Ausprägungen                                                                                                                                                                      | Diskursive Institutionalisierung eines Politikfeldes                                                                                                                                                                                                       |
|-----------------------|-----------------------------------------------------------------------------------------------------------------------------------------------------------------------------------|------------------------------------------------------------------------------------------------------------------------------------------------------------------------------------------------------------------------------------------------------------|
| Semantische Ebene     | Kategorien, Definitionen, Begriffe eines Diskurses in der Benennung oder in den Aufgabenbeschreibungen von Organisationseinheiten                                                 | <ul style="list-style-type: none"> <li>• Signalisierung von Verantwortlichkeit / Zuständigkeit, Anschlusskommunikation</li> <li>• Definitionsarbeit am Politikfeldgegenstand (umstrittenes Anliegen)</li> <li>• Relative Dominanz von Diskursen</li> </ul> |
| Organisationale Ebene | Entstehung neuer Organisationseinheiten                                                                                                                                           | Positionierung im Feld durch die Akkumulation personeller und finanzieller Ressourcen sowie durch Expertise                                                                                                                                                |
|                       | Organisationseinheiten:<br>1. Außerhalb der ordentlichen Hierarchie<br>a. Projektgruppen, b. Stäbe<br><br>2. Innerhalb der ordentlichen Hierarchie<br>c. Referate, d. Abteilungen | Institutionalisierung in „Breite“ und „Tiefe“ im Ministerium. Von a nach d nimmt der Grad der Institutionalisierung und der Autonomisierung zu.                                                                                                            |
|                       | Organisationales Gefüge:<br><ul style="list-style-type: none"> <li>• Bündelung (in Abteilungen)</li> <li>• Koordinationsmechanismen</li> </ul>                                    | Konstruktion von Sinnzusammenhängen<br>Institutionalisierung von Kooperation und/oder Konflikten                                                                                                                                                           |

Quelle: Eigene Darstellung
